# Supplementary material
Source: publisher figshare collection journal article supplement (https://acs.figshare.com/ndownloader/files/5439719)
Supplement: Supplementary file 1 [file 5439719]

---

## Supporting Information

### Antibacterial Activity of Silver doped Titanate Nanowires on Ti

#### Implants

Ziqiang Xu<sup>b#</sup>, Man Li<sup>b#</sup>, Xia Li<sup>b</sup>, Xiangmei Liu<sup>b\*</sup>, Fei. Ma<sup>a</sup>, Shuilin Wu<sup>b\*</sup>, K.W. K.

Yeung<sup>c</sup>, Yong Han<sup>a\*</sup>, Paul K Chu<sup>d</sup>

<sup>a</sup> *State Key Laboratory for Mechanical Behavior of Materials, School of Materials*

*Science and Engineering, Xi'an Jiaotong University*

<sup>b</sup> *Hubei Collaborative Innovation Center for Advanced Organic Chemical Materials,*

*Ministry-of-Education Key Laboratory for the Green Preparation and Application of*

*Functional Materials, Hubei Key Laboratory of Polymer Materials, School of*

*Materials Science & Engineering, Hubei University, Wuhan, China*

<sup>c</sup> *Division of Spine Surgery, Department of Orthopaedics & Traumatology, Li Ka*

*Shing Faculty of Medicine, The University of Hong Kong, Hong Kong, China*

<sup>d</sup> *Department of Physics & Materials Science, City University of Hong Kong, Tat Chee*

*Avenue, Kowloon, Hong Kong, China*

These two authors contributed equally to this work.

\* To whom correspondence should be addressed:

E-mail: [shuilin.wu@gmail.com](mailto:shuilin.wu@gmail.com); [shuilin.wu@hubu.edu.cn](mailto:shuilin.wu@hubu.edu.cn) (S.L. Wu);

[yonghan@mail.xjtu.edu.cn](mailto:yonghan@mail.xjtu.edu.cn) (Y. Han)

Tel: +86-27-88661729 and Fax: +86-27-88665610 (SL Wu)

---

## Table of contents in supporting information

1. Contact angle values of prepared HT Ti. (Table S1)
2. EDS spectrum of TNWs. (Figure S1)
3. Images of water droplets lying on flat prepared samples surfaces. (Figure S2)
4. EDS spectra Ag doped and Ag/CS capped TNWs. (Figure S3)
5. XRD spectra of TNWs, Ag doped and Ag/CS capped TNWs. (Figure S4)
6. EDS spectra of (a) Ag doped TNWs, and (b) Ag/CS capped TNWs soaked in SBF for 14 Days.
7. The morphologies of the *E. coli* and *S. aureus* attached on the MP Ti, Ag doped TNWs and Ag/CS capped TNWs. (Figure S6)
8. The molecular structure of CS (a). The scheme for coordination process of CS to  $\text{Ag}^+$ . (Figure S7)
9. Fluorescent images of MC3T3 cells cultured on TNWs and Ag/CS TNWs for 24 h. (Figure S8)

---

Table S1 Contact angle values of prepared samples surfaces

|                   | <b>MP Ti</b> | <b>C-0.2</b> | <b>C-0.5</b> | <b>C-1</b> | <b>C-2.5</b> |
|-------------------|--------------|--------------|--------------|------------|--------------|
| <b>Angles (°)</b> | 63.3         | 9.6          | 10.4         | 14.7       | 2.7          |

---

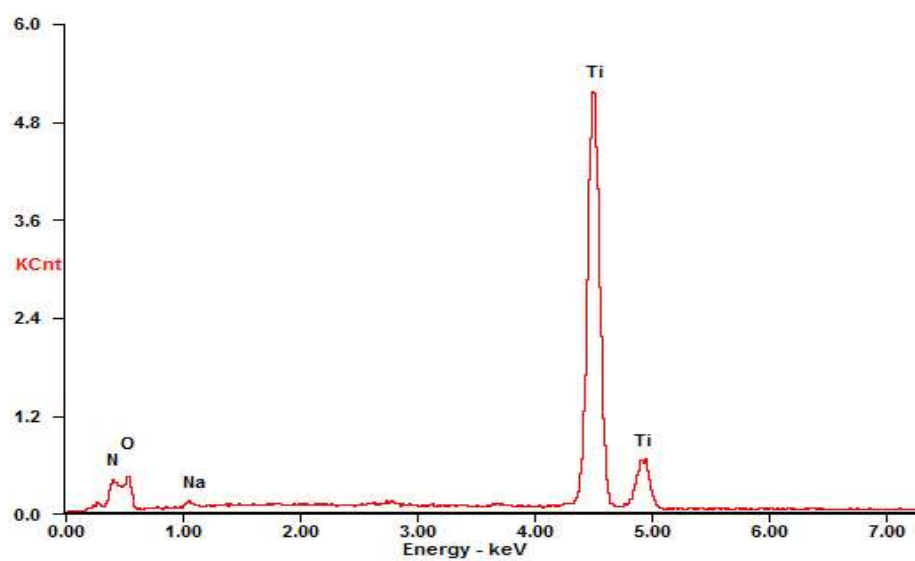

Figure S1. EDS spectrum of TNWs.

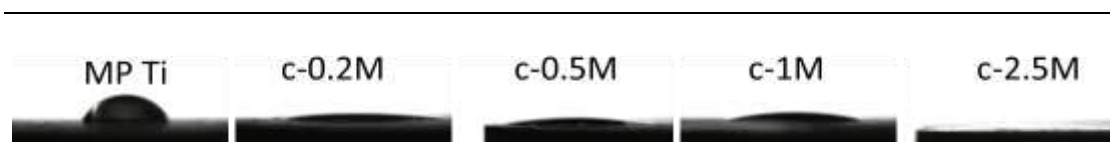

Figure S2. Images of water droplets lying on MP-Ti and TNWs modified Ti plates

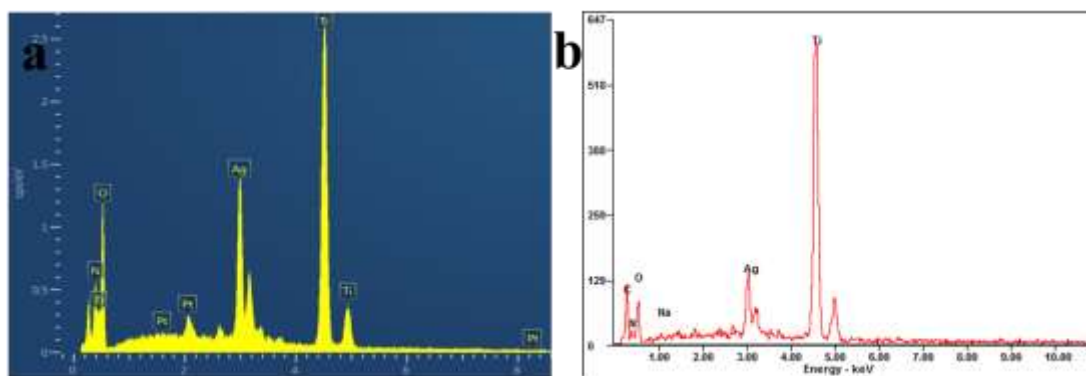

Figure S3. EDS spectra Ag doped (a) and Ag/CS capped TNWs (b).

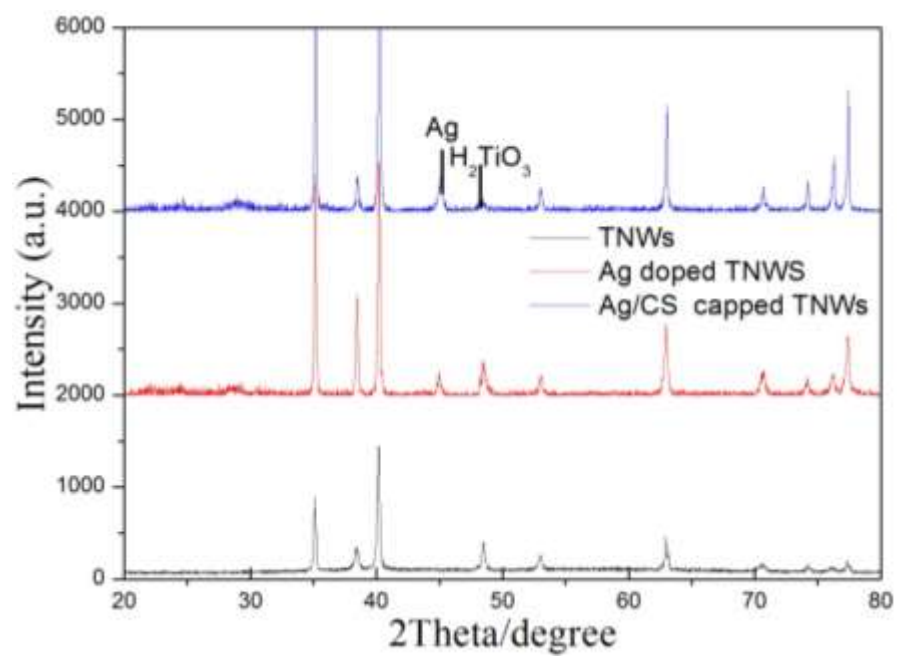

Figure S4. XRD spectra of TNWs, Ag doped and Ag/CS capped TNWs

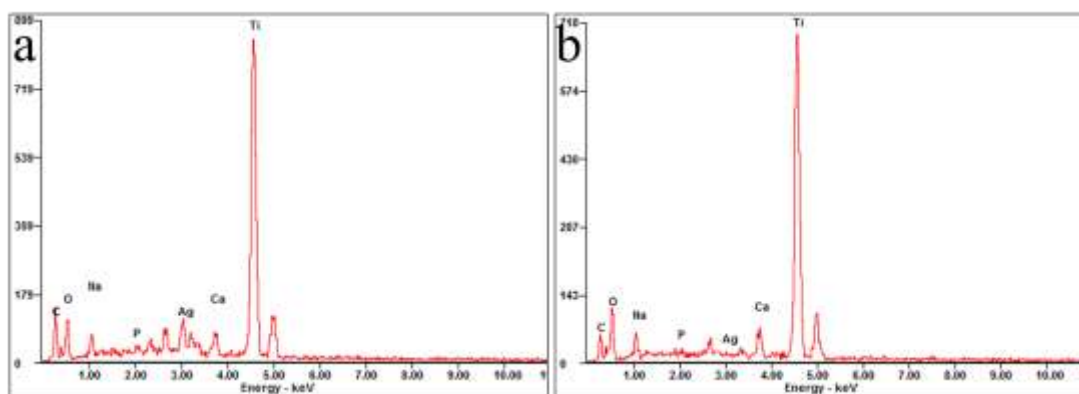

Figure S5 EDS spectra of (a) Ag doped TNWs, and (b) Ag/CS capped TNWs soaked in SBF for 14 Days.



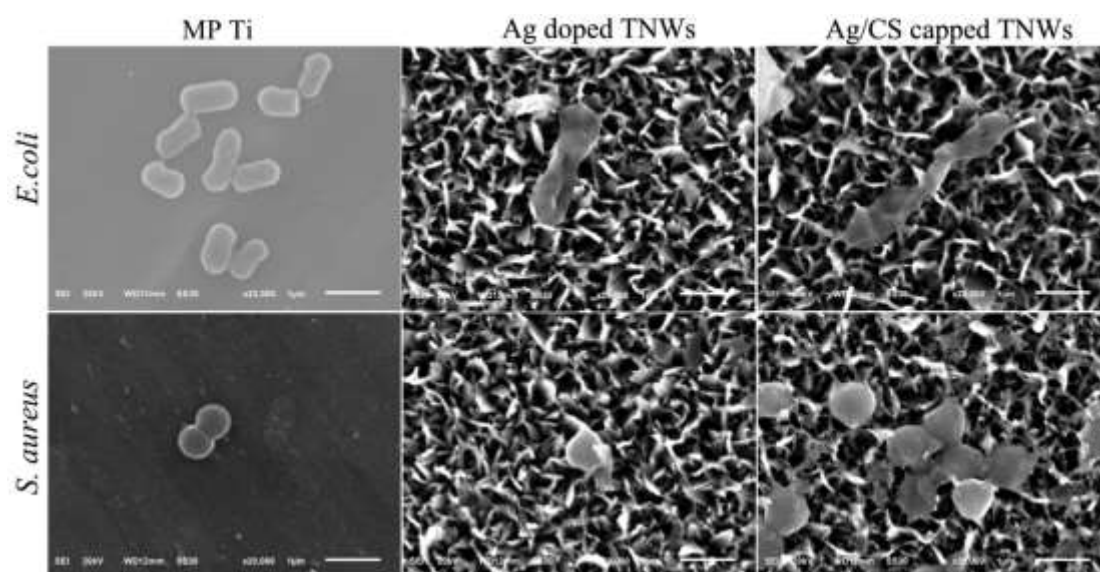

Figure S6. The morphologies of the *E. coli* and *S. aureus* attached on the MP Ti, Ag doped TNWs and Ag/CS capped TNWs.

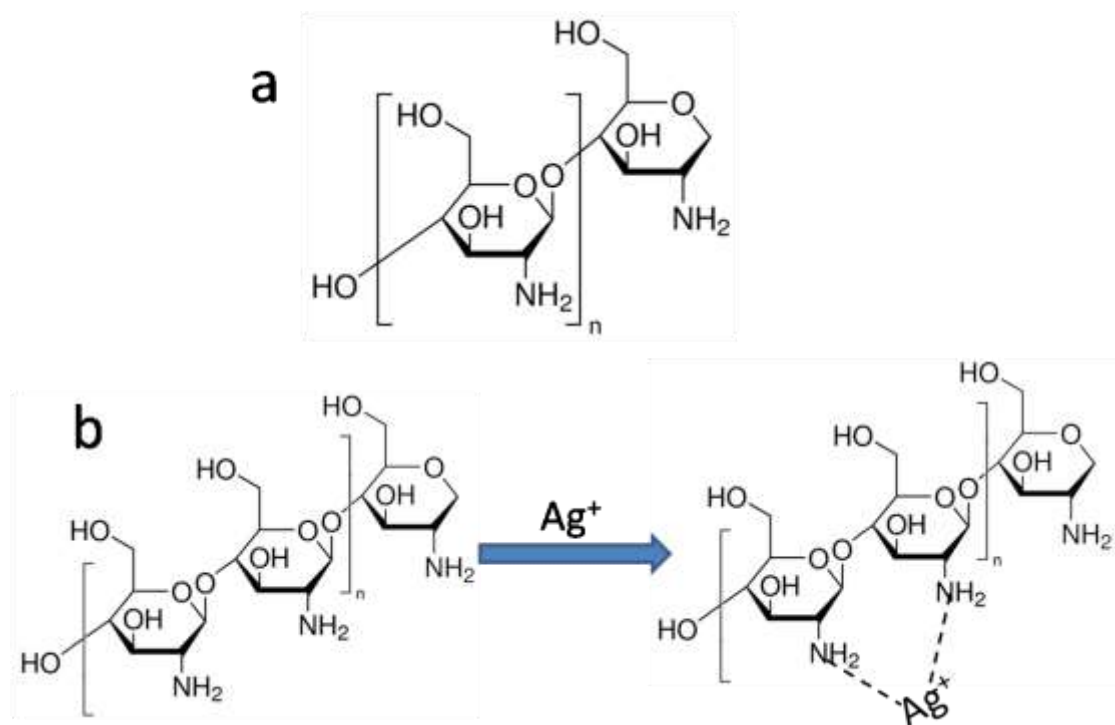

Figure S7. The molecular structure of CS (a). The scheme for coordination process of CS to  $\text{Ag}^+$ .

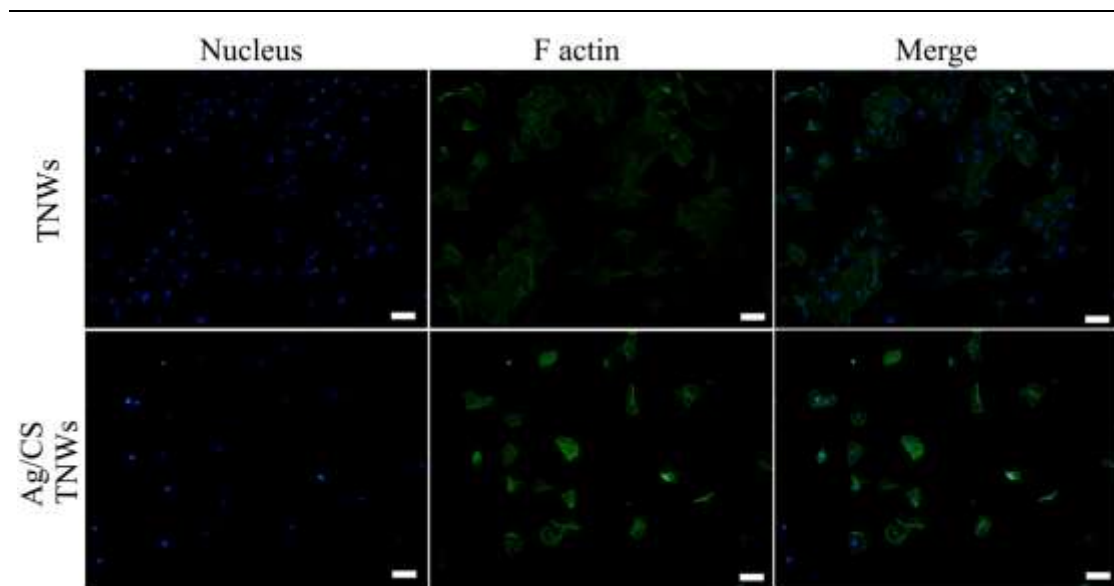

Figure S8. Fluorescent images of MC3T3 cells cultured on TNWs and Ag/CS TNWs for 24 h (scale bar: 100  $\mu$ m).
